# Supplementary material
Source: publisher site journal article supplement (https://zse.pensoft.net/article/94333/download/suppl/31/)
Supplement: Supplementary file 1

**Table S1.** List of species including voucher’s specimen number, species name, locality information and Specimen voucher No/GenBank accession no.

| **P.I.** | **Species, River, Locality, Basin** | **Code** | **Coordinates** | **Altitude** | **Ns** | **Nh** | **GenBank no.** |
| --- | --- | --- | --- | --- | --- | --- | --- |
|  | ***A. tzanevi*** |  |  |  |  |  |  |
| 1 | R. Rezve, Kırklareli, BlackSea* | RZV | 41°58.026'N / 28°01.194'E | 10 | 2 | hAtz1  hAtz2  hAtz3  hAtz4  hAtz5  hAtz6  hAtz7 | MZ539458 MZ539459 MZ539460 MZ539461 MZ539462 MZ539463 MZ539464 |
| 2 | R. Bulanık, Demirköy, BlackSea | BLK | 41°50.074'N / 27°47.419'E | 165 | 2 |
| 3 | R. Istranca, Istanbul, BlackSea | ITC | 41°23.192'N / 28°26.480'E | 6 | 4 |
| 4 | R. Binkılıç, Catalca, BlackSea | BKC | 41°22.771'N / 28°17.791'E | 46 | 2 |
| 6 | R. Aydınlar, Ereğli, BlackSea | AYD | 41°16.077'N / 31°32.432'E | 195 | 2 |
| 5 | R. Göksu, Izmit, BlackSea | GKS | 40°55.036'N / 29°45.564'E | 203 | 3 |
| 7 | R. Gökırmak, Bartın, Karadeniz | GKM | 41°33.574'N / 32°24.776'E | 201 | 2 |
| 8 | R. Karasu, Sinop, BlackSea | KRS | 41°52.702'N / 34°52.854'E | 300 | 2 |
|  |  |  |  |  | **19** |  |  |
|  | ***A. manyasensis*** |  |  |  |  |  |  |
| 9 | R. Sakan, Kocaçay, Manyas, Marmara Sea | SKR | 40°02.991'N / 27°57.743'E | 342 | 2 | hAm1 hAm2 | MZ539456 MZ539457 |
| 10 | R. Değirmenboğazı, Kocaçay, Manyas, Marmara Sea* | DGM | 40°00.011'N / 27°49.703'E | 51 | 3 |
| 11 | R. Alburak, Kocaçay, Balıkesir, Marmara Sea | ABK | 39°52.644'N / 27°46.750'E | 126 | 1 |
| 12 | R. Koca, Balya, Balikesir, Marmara Sea | BLY | 39°47.665'N / 27°37.662'E | 116 | 2 |
| 13 | R. Emet, Kocaçay, Dursunbey, Balıkesir, Marmara Sea | EMT | 39°37.096'N / 28°56.710'E | 362 | 3 |
|  |  |  |  |  | **11** |  |  |
|  | ***A. smyrnae*** |  |  |  |  |  |  |
| 14 | R. Banaz, Büyük Menderes, Usak, Aegean Sea | BNZ | 38°33.008'N / 29°37.216'E | 735 | 6 | hAsmy | MZ539436 |
| 15 | R. Cine, Büyük Menderes, Aydın, Aegean Sea | CIN | 37°25.568'N / 28°08.257'E | 280 | 4 |
|  |  |  |  |  | **10** |  |  |
|  | ***A. kosswigi*** |  |  |  |  |  |  |
| 16 | R. Göynük, Sakarya, Bilecik, BlackSea | GYK | 40°24.609’N / 30°47.143'E | 771 | 3 | hAkw1 hAkw2 hAkw3 hAkw4 hAkw5 hAkw6 | MZ539466 MZ539467 MZ539468 MZ539469 MZ539470 MZ539471 |
| 17 | R. Porsuk, Sakarya, Kütahya, BlackSea | PSK | 39°30.978'N / 30°02.634'E | 919 | 3 |
| 18 | R. Pürtek, Sakarya, Eskişehir, BlackSea** | PTK | 39°43.264'N / 31°37.092'E | 1012 | 3 |
| 19 | R. Güdül, Sakarya, Ankara, BlackSea** | KRM | 40°14.135'N / 32°15.436'E | 683 | 4 |
|  |  |  |  |  | **13** |  |  |

**Tablo S1.** continued.

| **P.I.** | **Species, River, Locality, Basin** | **Code** | **Coordinates** | **Altitude** | **Ns** | **Nh** | **GenBank no.** |
| --- | --- | --- | --- | --- | --- | --- | --- |
|  | ***A. coskuncelebii*** |  |  |  |  |  |  |
| 20 | R. Büyükmelen, Düzce, BlackSea** | BML | 40°50.152'N / 31°06.423'E | 309 | **8** | hAcsk | MZ539464 |
|  | ***A. turani*** |  |  |  |  |  |  |
| 21 | R. Dirgine, Zonguldak, BlackSea* | DGN | 41°01.673'N / 31°50.909'E | 255 | **7** | hAsp | MZ539443 |
|  | ***A. freyhofi*** |  |  |  |  |  |  |
| 22 | R. Gökırmak, Kızılırmak, Boyabat, Sinop, BlackSea | GKM | 41°27.117'N / 34°53.192'E | 255 | 3 | hAfy1  hAfy2  hAfy3  hAfy4 | MZ539438 MZ539439  MZ539440 MZ539441 |
| 23 | R. Devrez, Kızılırmak, Tosya, Kastamonu, BlackSea** | DVZ | 40°59.021'N / 34°05.575'E | 559 | 3 |
| 24 | R. Devrez, Kızılırmak, Ilgaz, Çankırı, BlackSea** | IGZ | 40°54.161'N / 33°38.154'E | 844 | 3 |
| 25 | R. Delice, Kızılırmak, Yerkoy, Yozgat, Black Sea* | DLC | 39°37.196'N / 34°29.239'E | 773 | 3 |
| 26 | R. Kılıçözü, Kızılırmak, Kırşehir, BlackSea | KLC | 39°14.294'N / 34°07.400'E | 1046 | 3 |
| 27 | R. Kesikköprü, Kızılırmak, Kırşehir, BlackSea | KKP | 38°57.391'N / 34°11.570'E | 863 | 3 |
| 28 | R. Kızılırmak, Zara, Sivas, BlackSea | KZL | 39°52.450'N / 37°44.743'E | 1335 | 3 |
|  |  |  |  |  | **21** |  |  |
|  | ***A. kurui*** |  |  |  |  |  |  |
| 29 | R. Tersakan, Yeşilırmak, Samsun, BlackSea** | TSK | 40°59.352'N / 35°43.029'E | 643 | 7 | hAkr | MZ539442 |
| 30 | R. Tozantı, Yeşilırmak, Erbaa, BlackSea** | ERB | 40°45.818'N / 36°29.046'E | 211 | 2 |
|  |  |  |  |  | **9** |  |  |
|  | ***A. fasciatus*** |  |  |  |  |  |  |
| 31 | R. Iyidere, Rize, BlackSea | IYD | 40°58.075'N / 40°22.682'E | 37 | 3 | hAfc | MZ539450 |
| 32 | R. Kalkandere, Rize, BlackSea | KLD | 40°55.804'N / 40°26.461'E | 120 | 2 |
| 33 | R. Aralık, Borçka, Coruh, Artvin, BlackSea | ARK | 41°23.895'N / 41°44.069'E | 422 | 2 |
| 34 | R. Coruh, Ardanuç, Artvin, BlackSea | ARC | 41°07.184'N / 42°03.983'E | 485 | 2 |
| 35 | R. Coruh, Ispir, Erzurum, BlackSea | ISP | 40°28.722'N / 40°59.326'E | 1158 | 3 |
|  |  |  |  |  | **12** |  |  |

**Tablo S1.** continued.

| **P.I.** | **Species, River, Locality, Basin** | **Code** | **Coordinates** | **Altitude** | **Ns** | **Nh** | **GenBank no.** |
| --- | --- | --- | --- | --- | --- | --- | --- |
|  | ***A. eichwaldii*** |  |  |  |  |  |  |
| 36 | R. Kuruköprü, Kura, Göle, Caspian | KUR | 40°47.614'N / 42°37.224'E | 2020 | 2 | hAec1  hAec2  hAec3  hAec4  hAec5 | MZ539451 MZ539452 MZ539453 MZ539454 MZ539455 |
| 37 | R. Boyalı, Kura, Selim, Caspian | BYL | 40°26.836'N / 42°34.944'E | 2029 | 1 |
| 38 | R. Digor, Aras, Kars, Caspian | DGR | 40°15.807'N / 43°32.346'E | 1485 | 1 |
| 39 | R. Mehdan, Aras, Iğdır, Caspian | MHD | 40°06.410'N / 43°27.052'E | 1036 | 10 |
| 40 | R. Taşlıçay, Aras, Ağrı, Caspian | DBZ | 39°38.787'N / 43°21.991'E | 1751 | 3 |
|  |  |  |  |  | **17** |  |  |
|  | ***A. velioglui*** |  |  |  |  |  |  |
| 41 | R. Pülümür, Euphrates, Tunceli, Persian Gulf | PLM | 39°27.478'N / 39°53.259'E | 1385 | 1 | hAv1  hAv2  hAv3  hAv4  hAv5 | MZ539445 MZ539446 MZ539447 MZ539448 MZ539449 |
| 42 | R. Munzur, Euphrates, Tunceli, Persian Gulf | MNZ | 39°07.506'N / 39°30.471'E | 926 | 1 |
| 43 | R. Sultansuyu, Euphrates, Malatya, Persian Gulf ** | SLT | 38°06.517'N / 37°53.639'E | 1181 | 5 |
| 44 | R. Ziyaret Çayı, Euphrates, Adıyaman, P. Gulf | ZYT | 37°48.271'N / 38°16.940'E | 709 | 2 |
| 45 | R. Murat, Euphrates, Muş, Persian Gulf | MRT | 38°56.134'N / 41°30.687'E | 1261 | 3 |
|  |  |  |  |  | **12** |  |  |
|  | ***A. emineae*** |  |  |  |  |  |  |
| 46 | R. Beyazsu, Euphrates, Mardin, Persian Gulf * | BYZ | 37°13.078'N / 41°19.435'E | 610 | **6** | hAemn | MZ539444 |
|  | ***A diclensis*** |  |  |  |  |  |  |
| 47 | R. Erziki, Tigris, Hakkari, Persian Gulf* | EZK | 37°40.103'N / 43°52.201'E | 1403 | **8** | hAdcl | MZ539437 |
|  |  |  | **TOTAL** |  | **153** | **36** |  |

P.I.: Population index, Ns: Number of sample, Nh: Name of haplotypes

* Type locality

** Paratype locality
